# Supplementary material
Source: PubMed Central journal article supplement (PMC2775830)
Supplement: mmc1.pdf [file mmc1.pdf]

## Supplemental Data

*AJHG*, Volume 85

### ***TRPM1* Is Mutated in Patients with Autosomal-Recessive Complete**

### **Congenital Stationary Night Blindness**

Isabelle Audo, Susanne Kohl, Bart P. Leroy, Francis L. Munier, Xavier Guillonnet, Saddek Mohand-Said, Kinga Bujakowska, Emeline Nandrot, Birgit Lorenz, Markus Preising, Ulrich Kellner, Agnes B. Renner, Antje Bernd, Aline Antonio, Veselina Moskova-Doumanova, Marie-Elise Lancelot, Charlotte M. Poloschek, Isabelle Drumare, Sabine Defoort-Dhellemmes, Bernd Wissinger, Thierry Léveillard, Christian P. Hamel, Daniel F. Schorderet, Elfride De Baere, Wolfgang Berger, Samuel G. Jacobson, Eberhart Zrenner, José-Alain Sahel, Shomi S. Bhattacharya, and Christina Zeitz

**Table S1. Primers Used to Amplify *TRPM1***

|                         |                       |
|-------------------------|-----------------------|
| <i>TRPM1</i> _Ex0For    | GAGTGTGTGGCTCCGCTC    |
| <i>TRPM1</i> _Ex0Rev    | CTCCGCAACTGCTGACTCT   |
| <i>TRPM1</i> _Ex1'For   | GTTCATCTTGCTTCCCAAGA  |
| <i>TRPM1</i> _Ex1'Rev   | GCTAGCATGTGACTAACGTAC |
| <i>TRPM1</i> _Ex1For    | CCAGGCCCAAGTGCTCACA   |
| <i>TRPM1</i> _Ex1Rev    | TCCTGAGCAGATCCCTGGC   |
| <i>TRPM1</i> _Ex2For    | CTATTCAGATGTTGTGGGCAG |
| <i>TRPM1</i> _Ex2Rev    | CCACCCTTCTGACTCCTC    |
| <i>TRPM1</i> _Ex3For    | CAGATGGGGCATTCTGTCC   |
| <i>TRPM1</i> _Ex3Rev    | CCATGCCGAAGACCAGGTATC |
| <i>TRPM1</i> _Ex4For    | CACTCCCCTTTGACACGAGA  |
| <i>TRPM1</i> _Ex4Rev    | GTGACCCAGAGATGTTGACC  |
| <i>TRPM1</i> _Ex5For    | CCCCTGATCTGTAGGGAATG  |
| <i>TRPM1</i> _Ex5Rev    | GGGAAAGGCTGCAAGGGAG   |
| <i>TRPM1</i> _Ex6For    | GTATTGTGCTTGCTTCCCTTG |
| <i>TRPM1</i> _Ex6Rev    | CTTCTCAGCCTTGTTTCCACT |
| <i>TRPM1</i> _Ex7Fornew | GAACATCCCCCAAGTCGTAA  |
| <i>TRPM1</i> _Ex7Revnew | TGAGGAAATGGGAGAGGAGA  |
| <i>TRPM1</i> _Ex8Fornew | GGATATCCTCCCACAGCAA   |
| <i>TRPM1</i> _Ex8Revnew | AGCCTCAGAGGGTGTGTGTGT |
| <i>TRPM1</i> _Ex9For    | ACGTGTCAGTCTCTGTGGTC  |
| <i>TRPM1</i> _Ex9Rev    | GATTGCAAAGGAACCCATCTG |
| <i>TRPM1</i> _Ex10For   | GCTCGGAGCCTTTGTGGTC   |
| <i>TRPM1</i> _Ex10Rev   | CCATGTCACAAGGGAGAACAT |
| <i>TRPM1</i> _Ex11For   | GGTGTGCACATGTACATTGTG |
| <i>TRPM1</i> _Ex11Rev   | GGGTGGGACTGAAGCAAGG   |

|                        |                         |
|------------------------|-------------------------|
| <i>TRPM1_</i> Ex12For  | GAGATGGGGAGTGTTTACCC    |
| <i>TRPM1_</i> Ex12Rev  | GCACAATATGCACCAGTGACA   |
| <i>TRPM1_</i> Ex13For  | GCCTGGCCAAGAAAAACATA    |
| <i>TRPM1_</i> Ex13Rev  | CGCTGGCGTCAACCTATAAT    |
| <i>TRPM1_</i> Ex14For  | CTAGACGTGTGATGAAGTCCA   |
| <i>TRPM1_</i> Ex14Rev  | GTTGTTGAAAAGCAAGCGAGG   |
| <i>TRPM1_</i> Ex15For  | GCGTCTGCTGAGCTTTCTTC    |
| <i>TRPM1_</i> Ex15Rev  | GGATTGTGCAGCTTTTATCCC   |
| <i>TRPM1_</i> Ex16For  | CCTCTGACAGAAAGGGTCC     |
| <i>TRPM1_</i> Ex16Rev  | CTCCCTGCAGAGACAAGTAC    |
| <i>TRPM1_</i> Ex17For  | GCTTGCAGAGAACCTCAGAG    |
| <i>TRPM1_</i> Ex17Rev  | TCAGGGGGTTGCTAGAAGGA    |
| <i>TRPM1_</i> Ex18For  | CACCAACAGTGCTGTTTGCC    |
| <i>TRPM1_</i> Ex18Rev  | CCTTTAACCAGTGAGATTTCTC  |
| <i>TRPM1_</i> Ex19For  | GTGCCGGAGTGCCTTG CAT    |
| <i>TRPM1_</i> Ex19Rev  | CGAGATCCAATGTTAGCCAGA   |
| <i>TRPM1_</i> Ex20For  | CTGCCCTCCAGGTCTTCTGTCT  |
| <i>TRPM1_</i> Ex20Rev  | GGCCCAACATGCATAATTTGC   |
| <i>TRPM1_</i> Ex21For  | CAGATGACCTGGAATGTTCCA   |
| <i>TRPM1_</i> Ex21Rev  | CATGTAGGAGA ACTGTGTATCT |
| <i>TRPM1_</i> Ex22For  | CGTCCTAATTAAGCACTCGTG   |
| <i>TRPM1_</i> Ex22Rev  | GATGCCTATGGTGGAGTGAC    |
| <i>TRPM1_</i> Ex23For  | GATCACTGTTTCTAAGTGTGAAT |
| <i>TRPM1_</i> Ex23Rev  | GACTACTAGTAATCAGCTAAGG  |
| <i>TRPM1_</i> Ex24For  | CTGGGAGTCTCGCTCAGTC     |
| <i>TRPM1_</i> Ex24Rev  | GGTATCTTGGGAGCGTTCTG    |
| <i>TRPM1_</i> Ex25For  | GGGCACTAAAAGGCCATCTC    |
| <i>TRPM1_</i> Ex25Rev  | GTGCTTTTCACACGAGACAGT   |
| <i>TRPM1_</i> Ex26For  | CTGATAGAGGGTTGGGGCG     |
| <i>TRPM1_</i> Ex26Rev  | TCACTATTTTCGTGGGAACCAC  |
| <i>TRPM1_</i> Ex27aFor | CATGTTAGGGGATTGTGAAGC   |
| <i>TRPM1_</i> Ex27aRev | CTGCAAGGTGACTGCCATCT    |
| <i>TRPM1_</i> Ex27bFor | CTAACAGAATGGTGAATGCTCT  |
| <i>TRPM1_</i> Ex27bRev | GGTTTCTTCCAGGGGATAGG    |
| <i>TRPM1_</i> Ex27cFor | GCTGATGGCTACAGCTTGTAT   |
| <i>TRPM1_</i> Ex27cRev | CATCTTGCATATCTGCAA ACTG |
| <i>TRPM1_</i> Ex27dFor | GATCACGCGCTCTCATAGCA    |
| <i>TRPM1_</i> Ex27dRev | CCCATTAGTGGTTCTGACT     |
